# Supplementary material
Source: PubMed Central journal article supplement (PMC3922306)
Supplement: NIHMS524500-supplement-Supporting_Information.pdf [file NIHMS524500-supplement-Supporting_Information.pdf]

**SUPPORTING INFORMATION**

**DOI:** 10.1002/ejoc.201200695

**Title:** Single-Step Radiosynthesis of “<sup>18</sup>F-Labeled Click Synthons” from Azide-Functionalized Diaryliodonium Salts

**Author(s):** Joong-Hyun Chun, Victor W. Pike\*

## **Table of Contents:**

Synthesis of halobenzyl azides

Synthesis of azidohaloarenes

References

Appendix 1.  $^1\text{H}$  and  $^{13}\text{C}$  spectra of azide-functionalized diaryliodonium salts

Appendix 2. Selected radio-HPLC chromatogram of radiofluorination of the reaction mixture of radiofluorination of diaryliodonium salt precursor

## Synthesis of halobenzyl azides

Reference iodobenzyl azides and fluorobenzyl azides were prepared by known procedures. Analytical data obtained for these compounds agreed with those previously reported in the literature.<sup>[1,2]</sup>

**4-Iodobenzyl azide.**<sup>[3]</sup> NaN<sub>3</sub> (1.37 g, 21 mmol) was added to a stirred solution of 4-iodobenzyl bromide (2.08g, 7 mmol) in DMF (10 mL) at r.t. The reaction mixture was stirred at r.t. for 3 h. Water (20 mL) was added to quench the reaction, and product was extracted with CH<sub>2</sub>Cl<sub>2</sub> (20 mL × 3). Combined organic layers were washed with water (50 mL × 3), dried over MgSO<sub>4</sub>, then concentrated to an oil. Column chromatography of crude product (silica using 10% EtOAc/hexane; R<sub>f</sub> = 0.57) gave the 4-iodobenzyl azide as a white solid (1.59 g, 87%). mp = 29–30 °C; <sup>1</sup>H-NMR (CDCl<sub>3</sub>) δ 7.71 (dd, *J* = 1.6, 8 Hz, 2H), 7.06 (d, *J* = 8 Hz, 2H), 4.29 (s, 2H); <sup>13</sup>C-NMR (CDCl<sub>3</sub>) δ 137.9, 135.0, 130.0, 93.9, 54.2.

The following compounds were prepared similarly. Fluoroarenes were obtained from corresponding fluorobenzyl bromides.

**3-Iodobenzyl azide.**<sup>[4]</sup> Colorless oil (2.46 g, 94%), R<sub>f</sub> = 0.55 (10% EtOAc/hexane); <sup>1</sup>H-NMR (CDCl<sub>3</sub>) δ 7.66–7.64 (m, 2H), 7.26 (d, *J* = 7.6 Hz, 1H), 7.10 (t, *J* = 9.6 Hz, 1H), 4.27 (s, 2H); <sup>13</sup>C-NMR (CDCl<sub>3</sub>) δ 137.6, 137.2, 136.9, 130.4, 127.2, 94.5, 53.8.

**2-Iodobenzyl azide.**<sup>[5]</sup> Pale yellow oil (0.52 g, 96%), R<sub>f</sub> = 0.50 (10% EtOAc/hexane); <sup>1</sup>H-NMR (CDCl<sub>3</sub>) δ 7.86 (d, *J* = 7.6 Hz, 1H), 7.36 (d, *J* = 4 Hz, 2H), 7.04–6.98 (m, 1H), 4.43 (s, 2H); <sup>13</sup>C-NMR (CDCl<sub>3</sub>) δ 139.6, 138.0, 129.8, 129.4, 128.5, 98.9, 58.9.

**4-Fluorobenzyl azide.**<sup>[2]</sup> Colorless oil (0.10 g, 32%, volatile), R<sub>f</sub> = 0.5 (10% EtOAc/hexane); <sup>1</sup>H-NMR (CDCl<sub>3</sub>) δ 7.31–7.25 (m, 2H), 7.09–7.05 (m, 2H), 4.31 (s, 2H); <sup>13</sup>C-NMR (CDCl<sub>3</sub>) δ 162.6 (d, *J*<sub>C-F</sub> = 246 Hz), 131.2 (d, *J*<sub>C-F</sub> = 3 Hz), 130.0 (d, *J*<sub>C-F</sub> = 8 Hz), 115.8 (d, *J*<sub>C-F</sub> = 21 Hz), 54.0; <sup>19</sup>F-NMR (CDCl<sub>3</sub>) δ –113.5.

**3-Fluorobenzyl azide.**<sup>[6]</sup> Colorless oil (0.27 g, 72%, volatile), R<sub>f</sub> = 0.52 (10% EtOAc/hexane); <sup>1</sup>H-NMR (CDCl<sub>3</sub>) δ 7.38–7.33 (m, 1H), 7.11–7.09 (m, 1H), 7.06–7.02 (m, 2H), 4.35 (s, 2H); <sup>13</sup>C-NMR (CDCl<sub>3</sub>) δ 163.1 (d, *J*<sub>C-F</sub> = 246 Hz), 137.8, 130.4 (d, *J*<sub>C-F</sub> = 8 Hz), 123.6 (d, *J*<sub>C-F</sub> = 3 Hz), 115.2 (d, *J*<sub>C-F</sub> = 21 Hz), 114.9, 54.2; <sup>19</sup>F-NMR (CDCl<sub>3</sub>) δ –112.3.

**2-Fluorobenzyl azide.**<sup>[7]</sup> Colorless oil (0.39 g, 65%, volatile),  $R_f = 0.2$  (hexane);  $^1\text{H-NMR}$  ( $\text{CDCl}_3$ )  $\delta$  7.37–7.31 (m, 2H), 7.19–7.08 (m, 2H), 4.41 (s, 2H);  $^{13}\text{C-NMR}$  ( $\text{CDCl}_3$ )  $\delta$  163.1 (d,  $J_{\text{C-F}} = 247$  Hz), 130.4 (d,  $J_{\text{C-F}} = 4$  Hz), 130.3 (d,  $J_{\text{C-F}} = 8$  Hz), 124.4 (d,  $J_{\text{C-F}} = 3$  Hz), 122.7 (d,  $J_{\text{C-F}} = 15$  Hz), 115.7 (d,  $J_{\text{C-F}} = 22$  Hz), 48.5 (d,  $J_{\text{C-F}} = 4$  Hz);  $^{19}\text{F-NMR}$  ( $\text{CDCl}_3$ )  $\delta$  -118.0.

### Synthesis of azidohaloarenes

Azidohaloarenes were prepared by known procedures. Analytical data for these compounds have been reported in the literature.<sup>[1,2]</sup>

#### **1-Azido-3-iodobenzene.**<sup>[8]</sup>

$\text{NaNO}_2$  (0.69 g, 10 mmol) in  $\text{H}_2\text{O}$  (10 mL) was added dropwise with vigorous stirring to an ice-cold solution of 3-iodoaniline (1.53 g, 7 mmol) and *conc.*  $\text{HCl}$  (5 mL) in  $\text{H}_2\text{O}$  (5 mL) and held at 0 °C for 1 h.  $\text{NaN}_3$  (1.04 g, 16 mmol) in  $\text{H}_2\text{O}$  (10 mL) was then added dropwise. The reaction mixture was kept below 5 °C and after 1 h product was extracted with  $\text{CH}_2\text{Cl}_2$  (20 mL  $\times$  3). The combined organic layers were washed with water (50 mL  $\times$  3). The organic layer was dried over  $\text{MgSO}_4$  and concentrated to a yellow crude oil. Column chromatography of this crude oil (silica, hexane;  $R_f = 0.52$ ) gave the product as a pale yellow oil (1.37 g, 80%);  $^1\text{H-NMR}$  ( $\text{CDCl}_3$ )  $\delta$  7.43 (dt,  $J = 1.2, 5.2$  Hz, 1H), 7.36 (t,  $J = 2$  Hz, 1H), 7.02 (t,  $J = 8$  Hz, 1H), 6.96–6.93 (m, 1H);  $^{13}\text{C-NMR}$  ( $\text{CDCl}_3$ )  $\delta$  141.2, 133.8, 130.9, 127.8, 118.3, 94.6.

The following compounds were prepared similarly. Fluoro compounds were prepared from the corresponding fluoroanilines.

**1-Azido-4-iodobenzene.**<sup>[1]</sup> Pale yellow solid (1.83 g, 75%),  $R_f = 0.53$  (hexane), mp = 31–32 °C;  $^1\text{H-NMR}$  ( $\text{CDCl}_3$ )  $\delta$  7.64 (d,  $J = 8.4$  Hz, 2H), 6.78 (d,  $J = 8.4$  Hz, 2H);  $^{13}\text{C-NMR}$  ( $\text{CDCl}_3$ )  $\delta$  140.0, 138.7, 121.0, 88.2.

**1-Azido-3-fluorobenzene.**<sup>[9]</sup> Pale yellow solid (0.45 g, 66%),  $R_f = 0.5$  (hexane);  $^1\text{H-NMR}$  ( $\text{CDCl}_3$ )  $\delta$  7.32–7.26 (m, 1H), 6.86–6.80 (m, 2H), 6.72 (dt,  $J = 2, 5.2$  Hz, 1H);  $^{13}\text{C-NMR}$  ( $\text{CDCl}_3$ )  $\delta$  163.5 (d,  $J_{\text{C-F}} =$

247 Hz), 141.9 (d,  $J_{\text{C-F}} = 10$  Hz), 130.9 (d,  $J_{\text{C-F}} = 10$  Hz), 114.7 (d,  $J_{\text{C-F}} = 3$  Hz), 111.8 (d,  $J_{\text{C-F}} = 21$  Hz), 106.7 (d,  $J_{\text{C-F}} = 24$  Hz);  $^{19}\text{F}$ -NMR ( $\text{CDCl}_3$ )  $\delta$  -110.8.

**1-Azido-4-fluorobenzene.**<sup>[9]</sup> Yellow oil (0.25 g, 45%, volatile),  $R_f = 0.45$  (hexane);  $^1\text{H}$ -NMR ( $\text{CDCl}_3$ )  $\delta$  7.07-7.026 (m, 2H), 6.99-6.96 (m, 2H);  $^{13}\text{C}$ -NMR ( $\text{CDCl}_3$ )  $\delta$  160.0 (d,  $J_{\text{C-F}} = 244$  Hz), 135.8 (d,  $J_{\text{C-F}} = 3$  Hz), 120.3 (d,  $J_{\text{C-F}} = 9$  Hz), 116.6 (d,  $J_{\text{C-F}} = 23$  Hz);  $^{19}\text{F}$ -NMR ( $\text{CDCl}_3$ )  $\delta$  -117.7.

## References

- [1] W. Qu, M.-P. Kung, C. Hou, S. Oya, H. F. Kung, *J. Med. Chem.* **2007**, *50*, 3380-3387.
- [2] L. Verduyn-Campbell, P. H. Elsinga, L. Mirfeizi, R. A. Dierckx, B. L. Feringa, *Org. Biomol. Chem.* **2007**, *50*, 3461-3463.
- [3] K. D. Park, P. Morieux, C. Salomé, S. W. Cotten, O. Reamtong, C. Eyers, S. J. Gaskell, J. P. Stables, R. Liu, H. Kohn, *J. Med. Chem.* **2009**, *52*, 6897-6911.
- [4] L. Díaz, J. Cases, J. Bujons, A. Llebaria, A. Delgado, *J. Med. Chem.* **2011**, *54*, 2069-2079.
- [5] F. Shi, J. P. Waldo, Y. Chen, R. C. Larock, *Org. Lett.* **2008**, *10*, 2409-2412.
- [6] L. Hu, S. Zhang, X. He, Z. Luo, X. Wang, W. Liu, X. Qin, *Bioorg. Med. Chem.* **2012**, *20*, 177-182.
- [7] X. Wang, T.-S. Mei, J.-Q. Yu, *J. Am. Chem. Soc.* **2009**, *131*, 7520-7521.
- [8] N. Faucher, Y. Ambroise, J.-C. Cintrat, E. Doris, F. Pillon, B. Rousseau, *J. Org. Chem.* **2002**, *67*, 932-934.
- [9] E. Leyva, D. Munoz, M. S. Platz, *J. Org. Chem.* **1989**, *54*, 5938-5945.

Appendix 1.  $^1\text{H}$  and  $^{13}\text{C}$  spectra of azide-functionalized diaryliodonium salts

Compound **3**

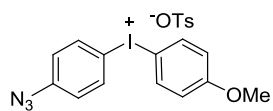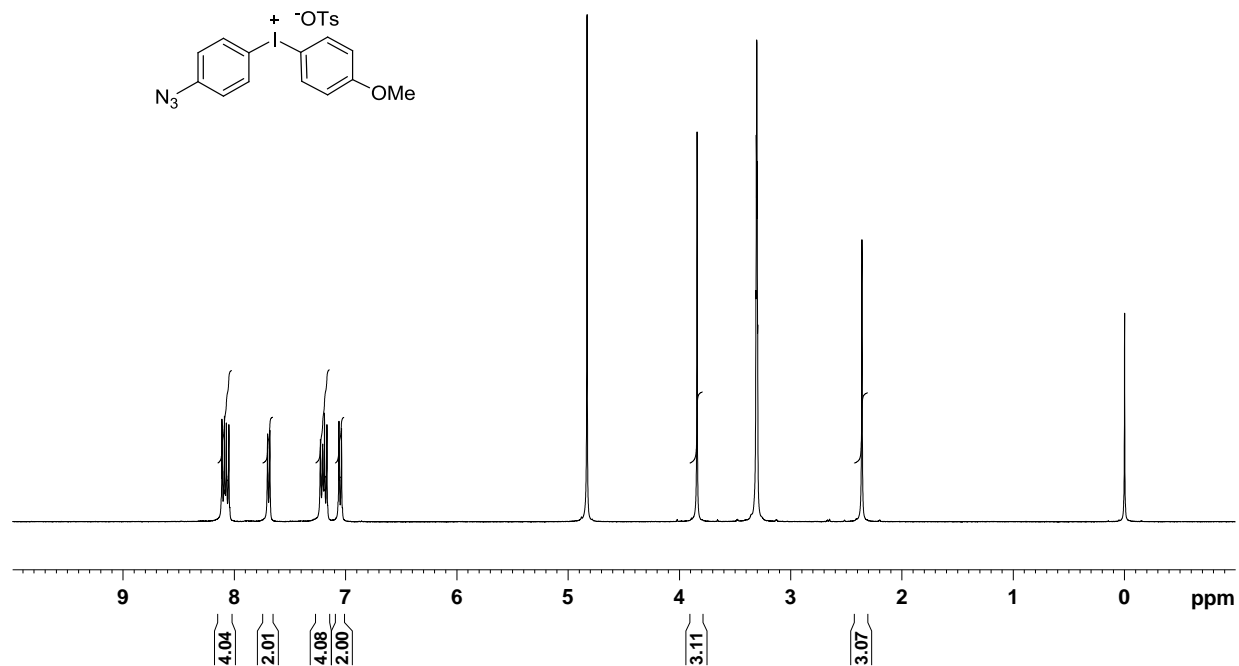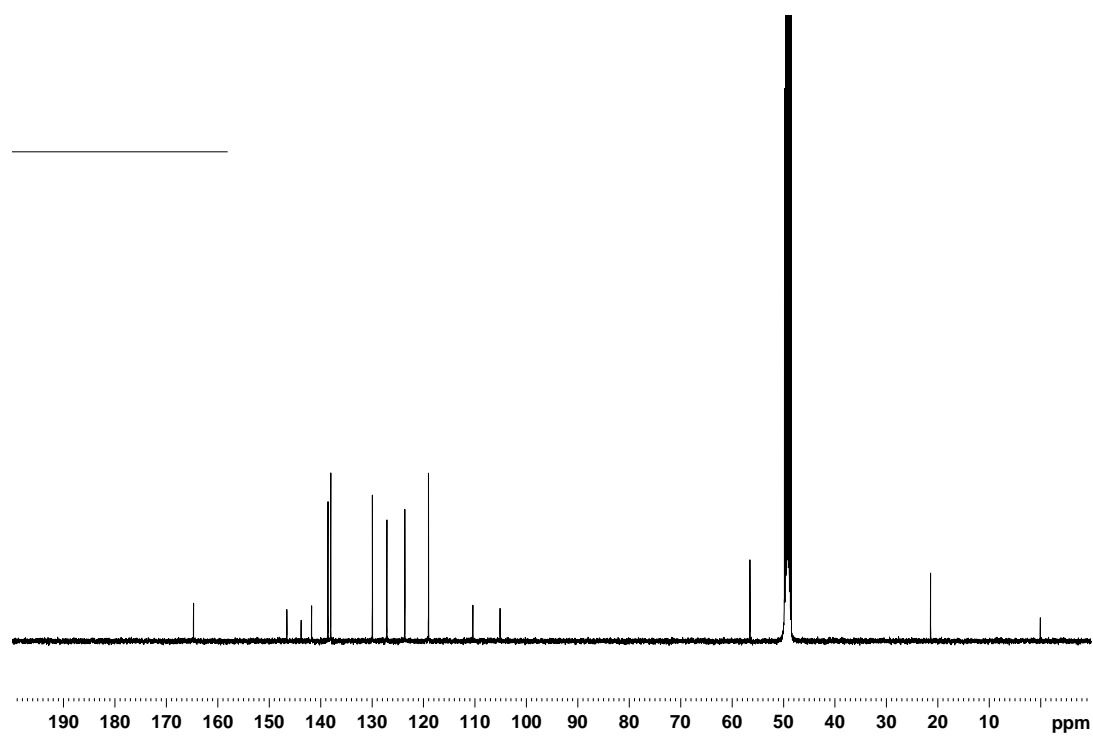

# Compound 4

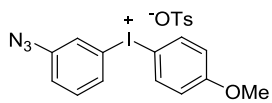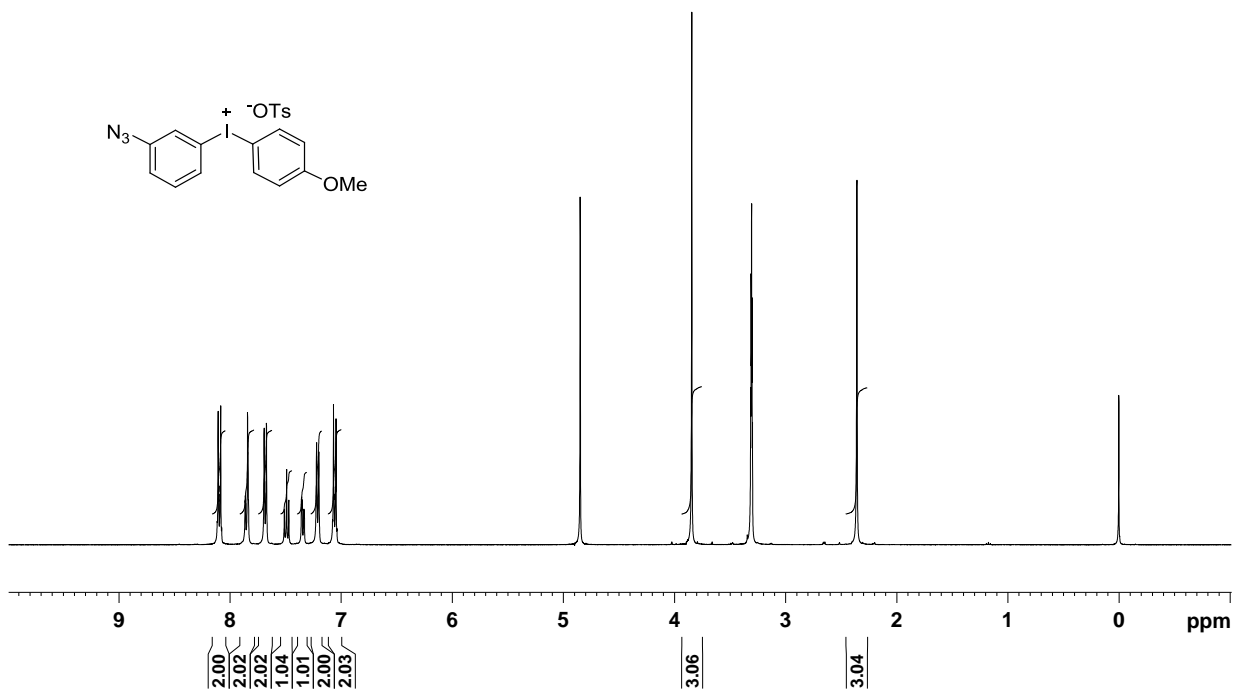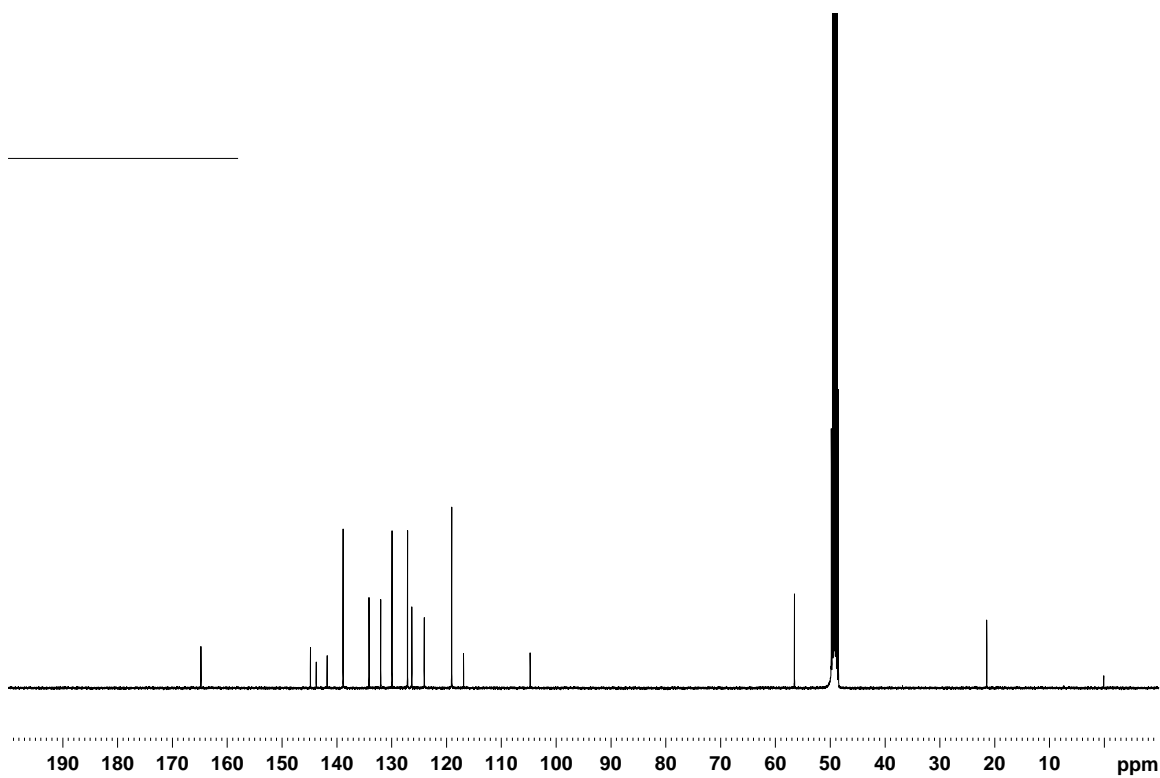

# Compound 5

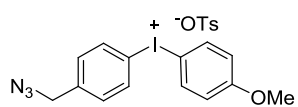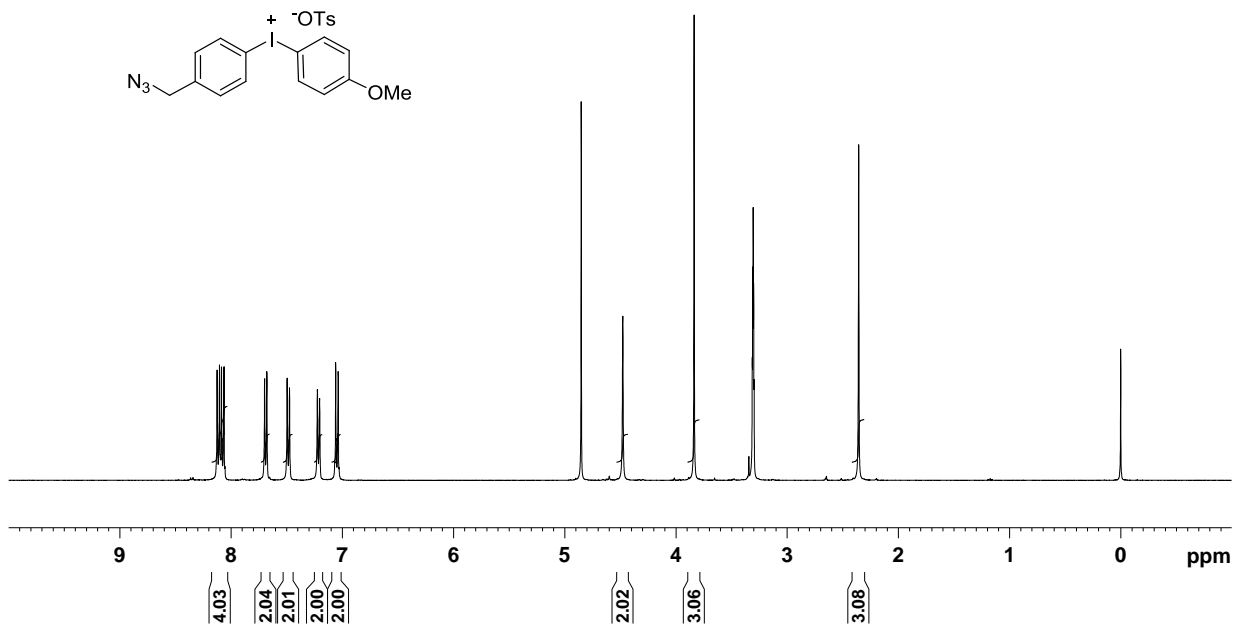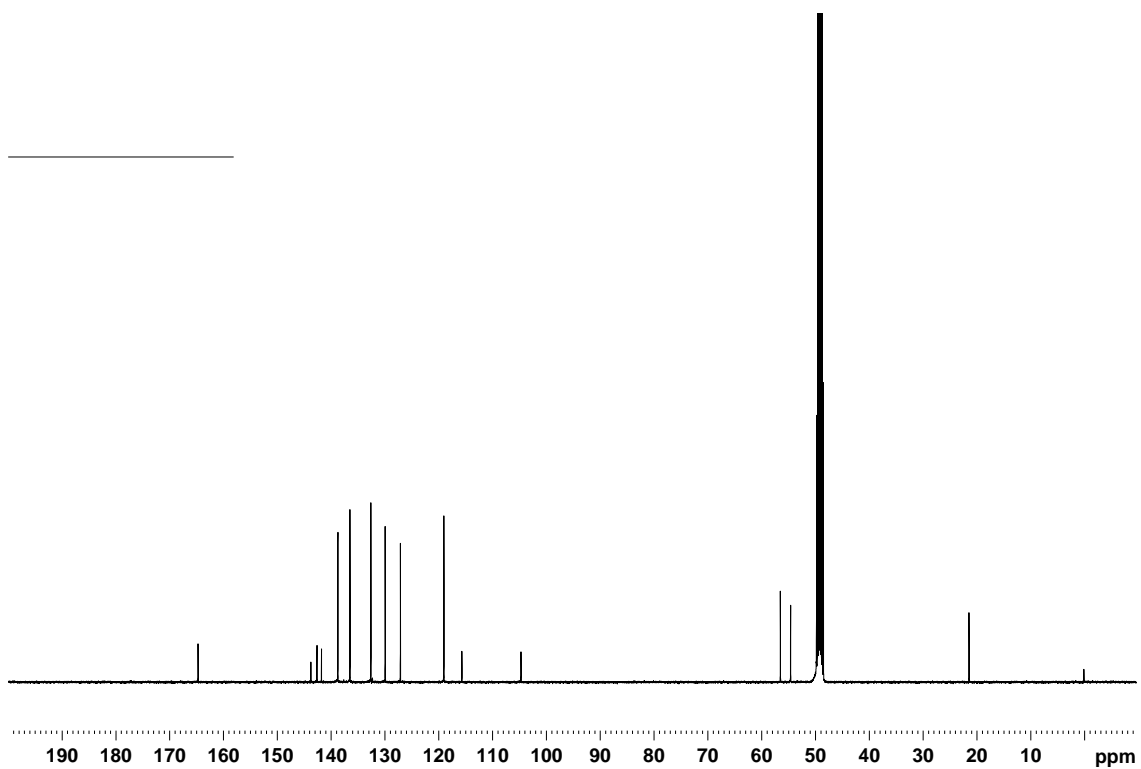



# Compound 6

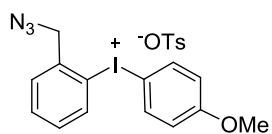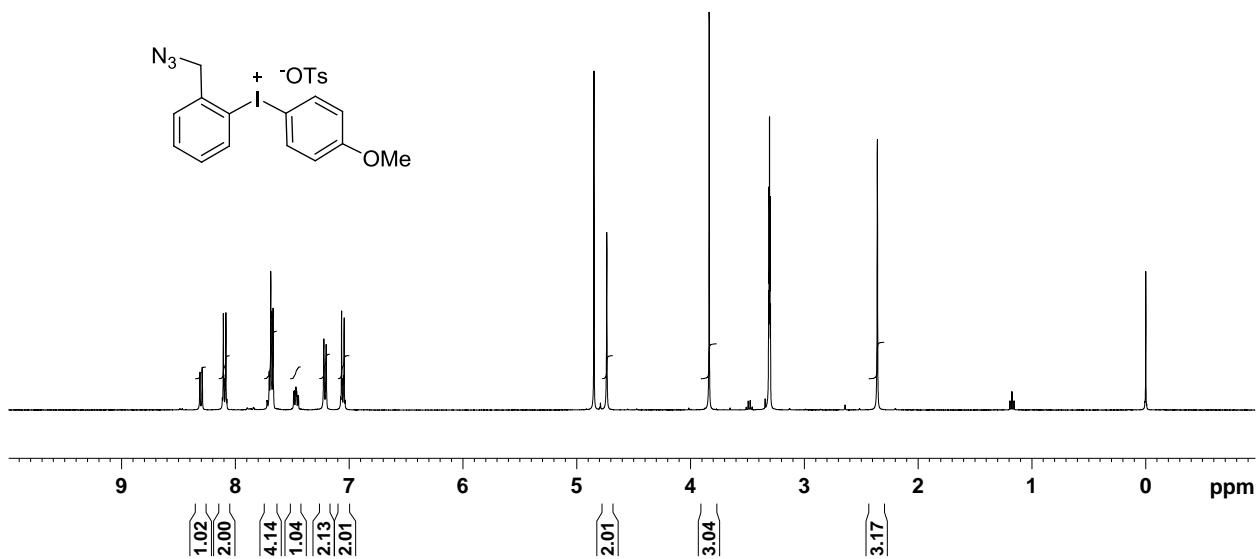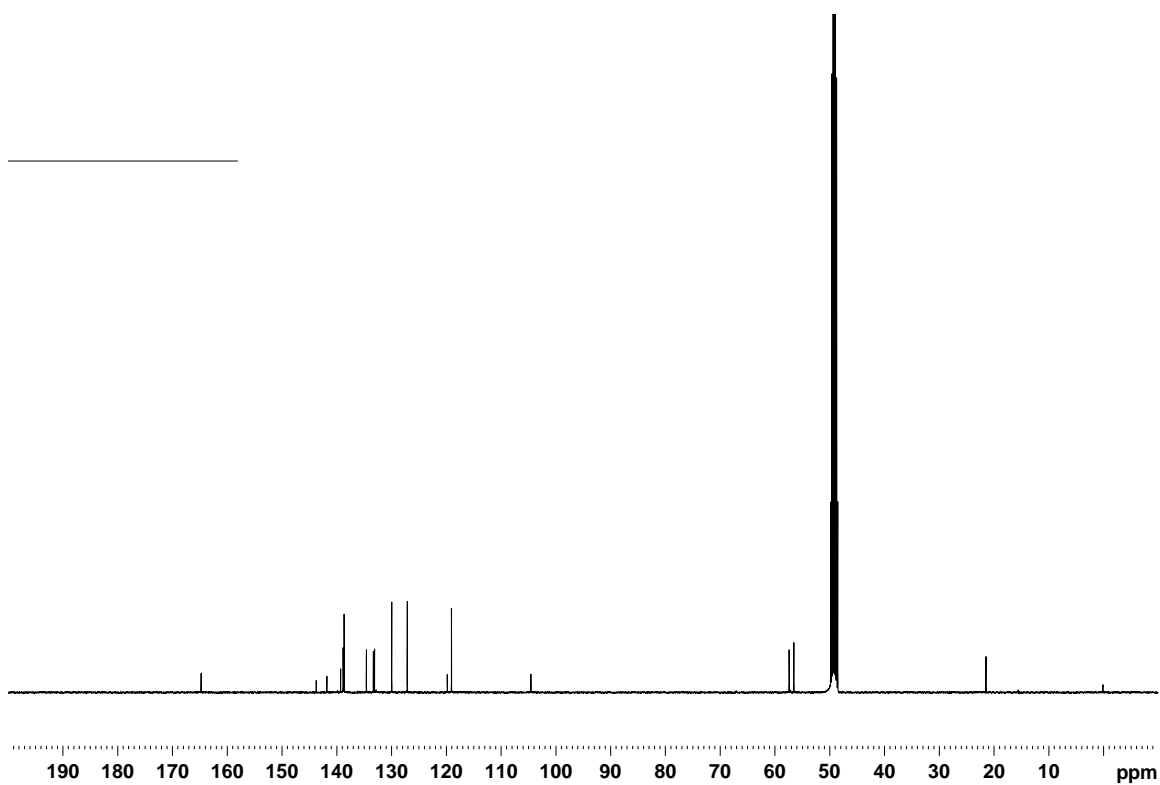

# Compound 7

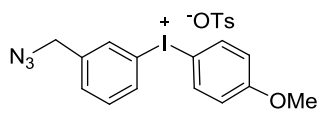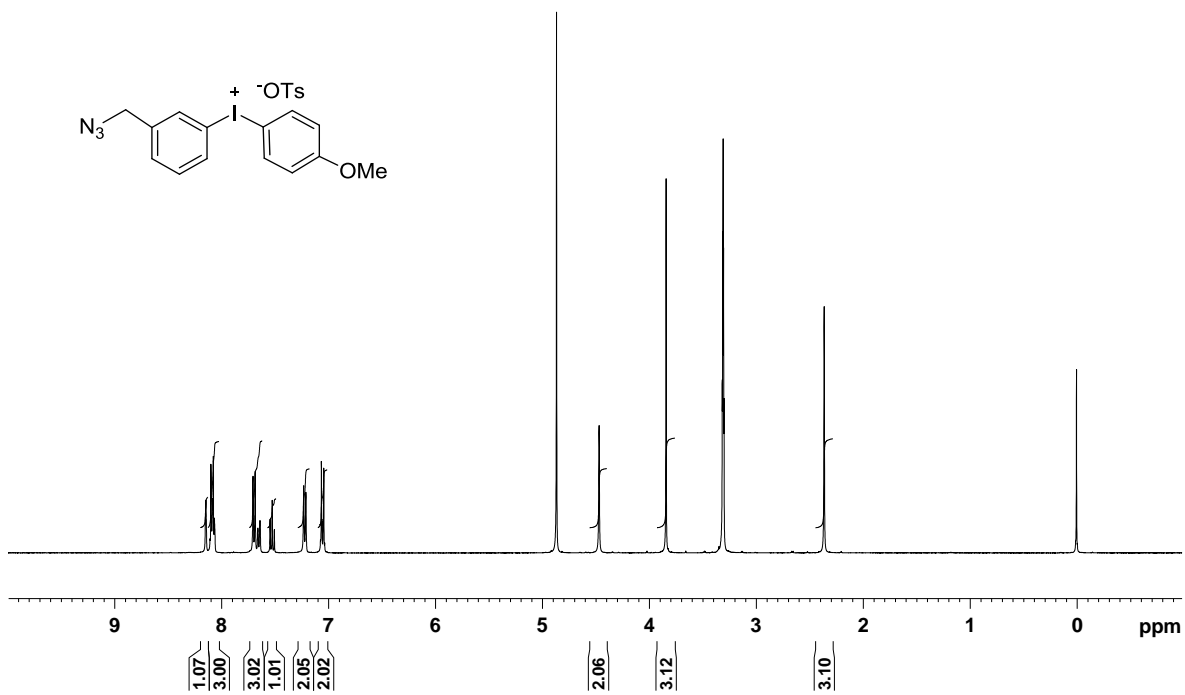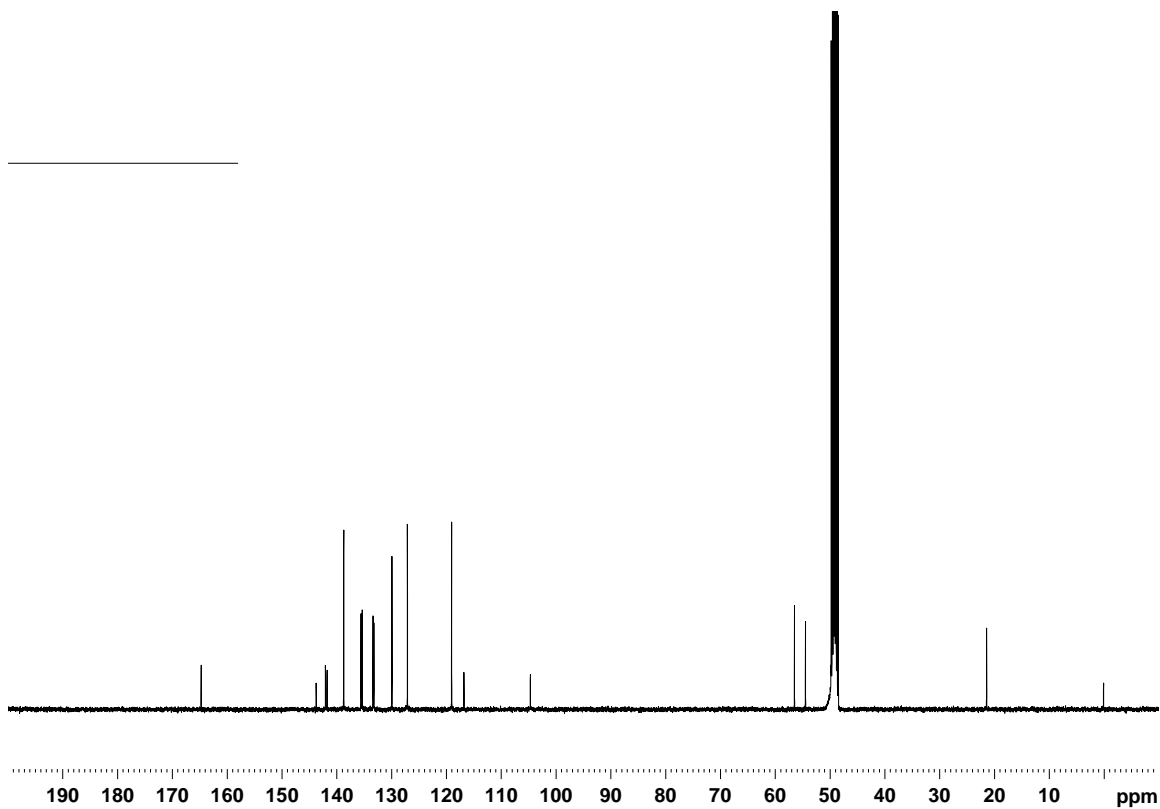

Compound 8

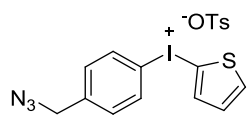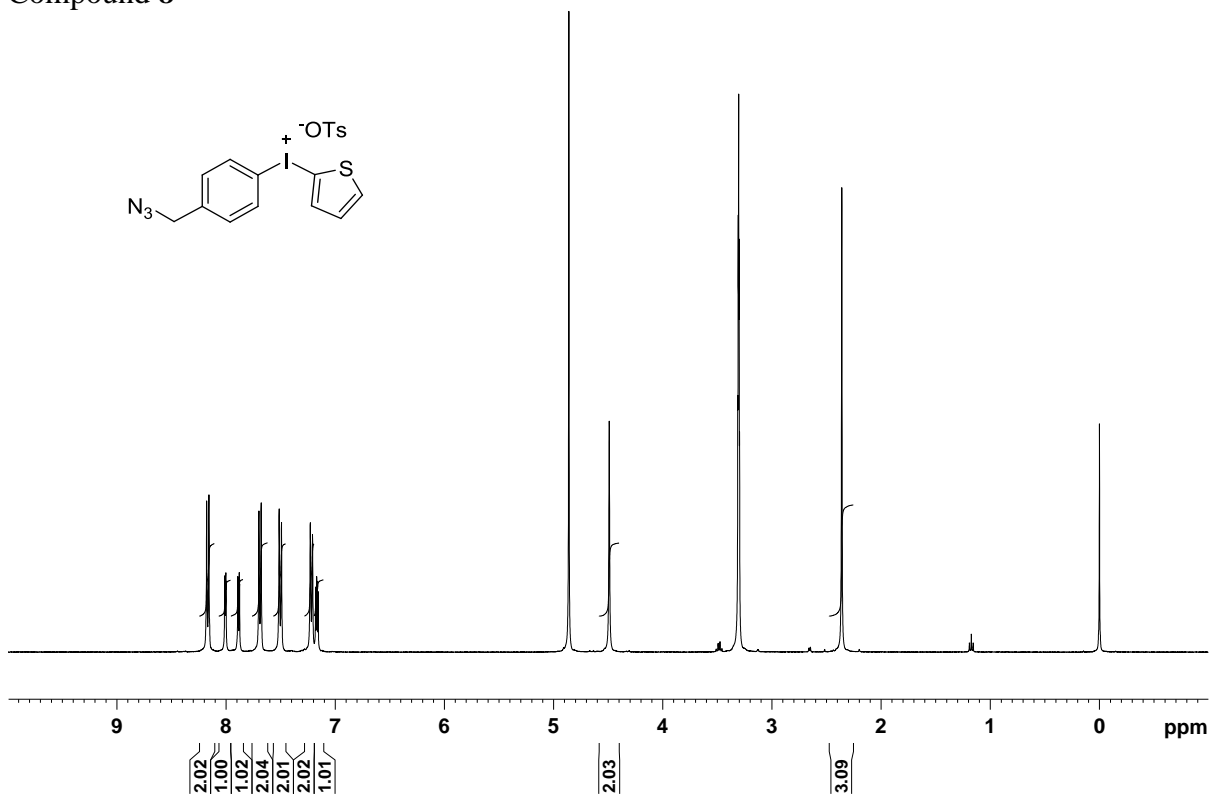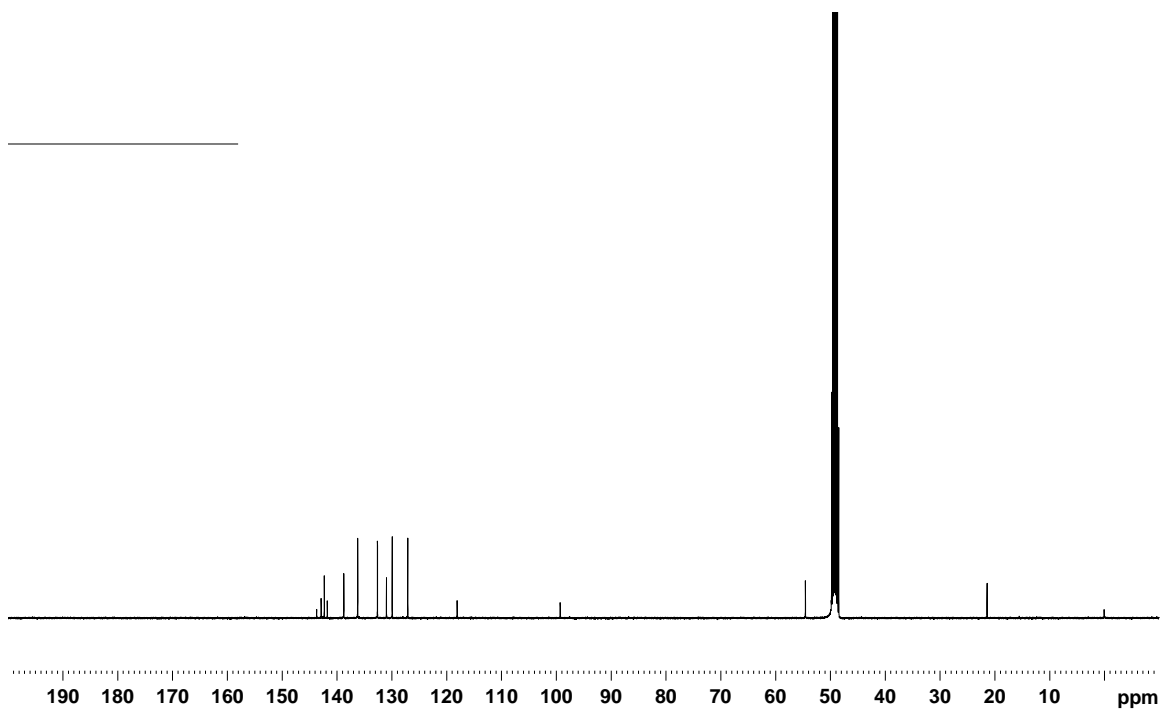

Compound 9

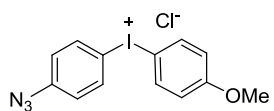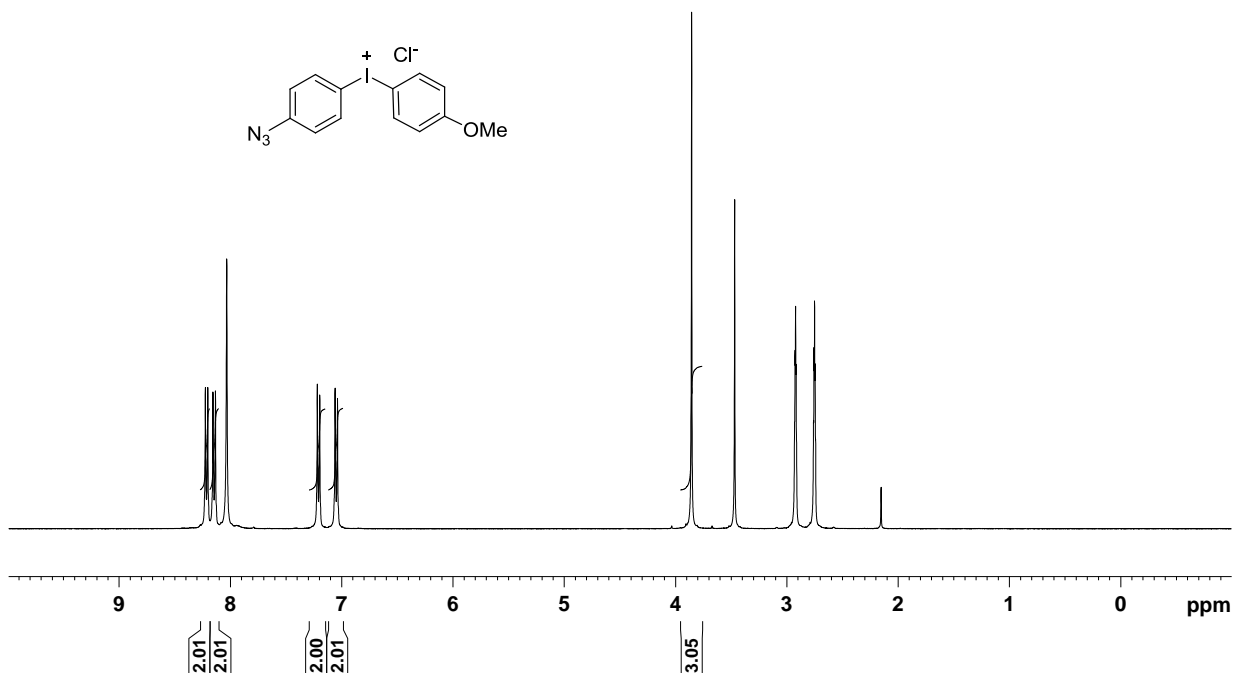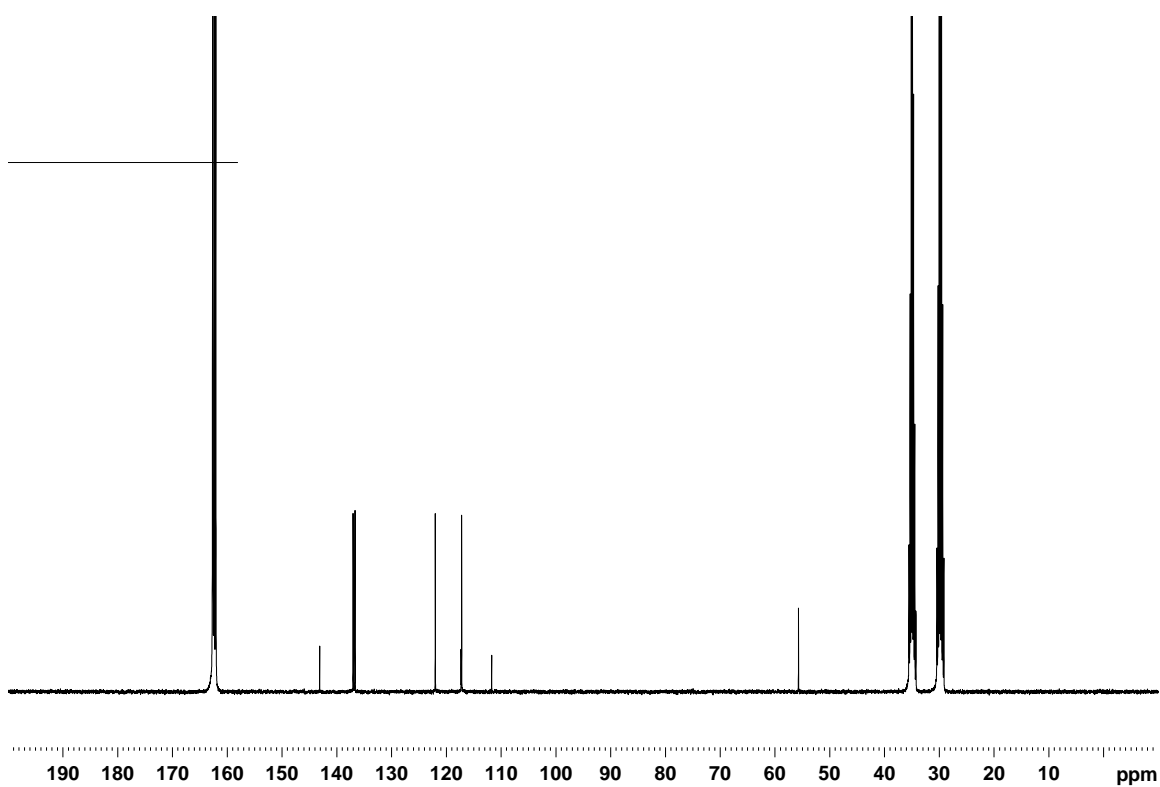

# Compound 10

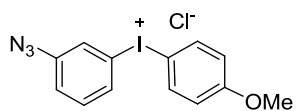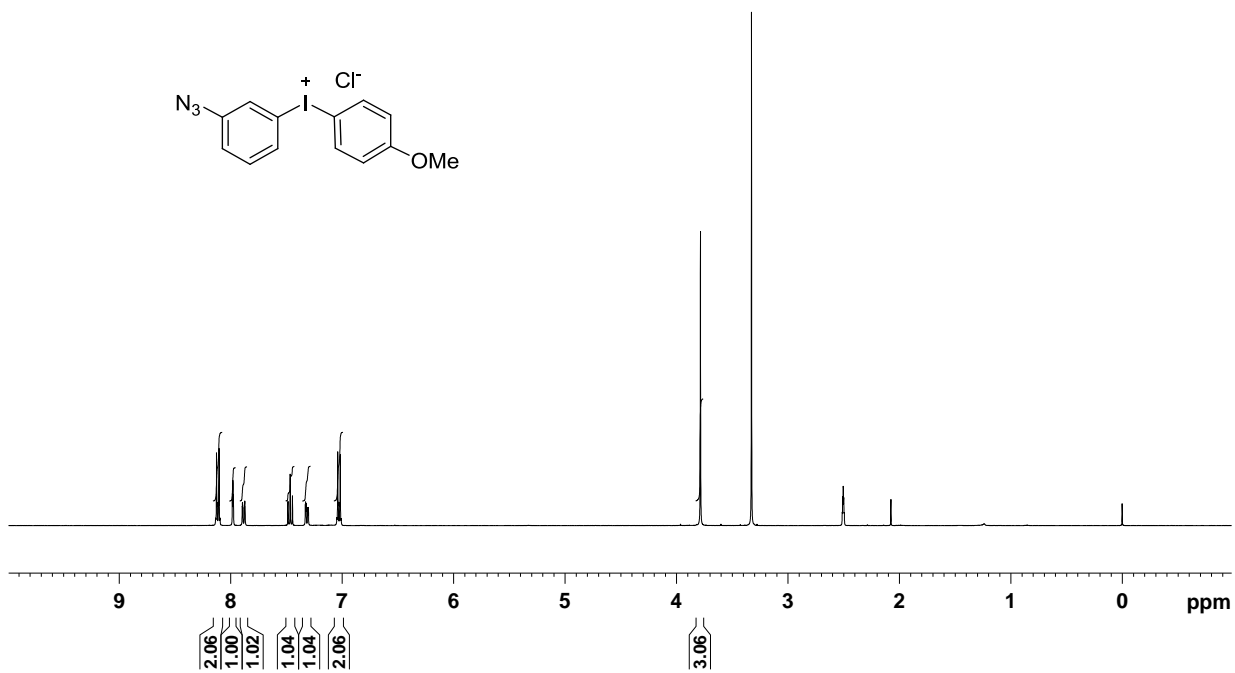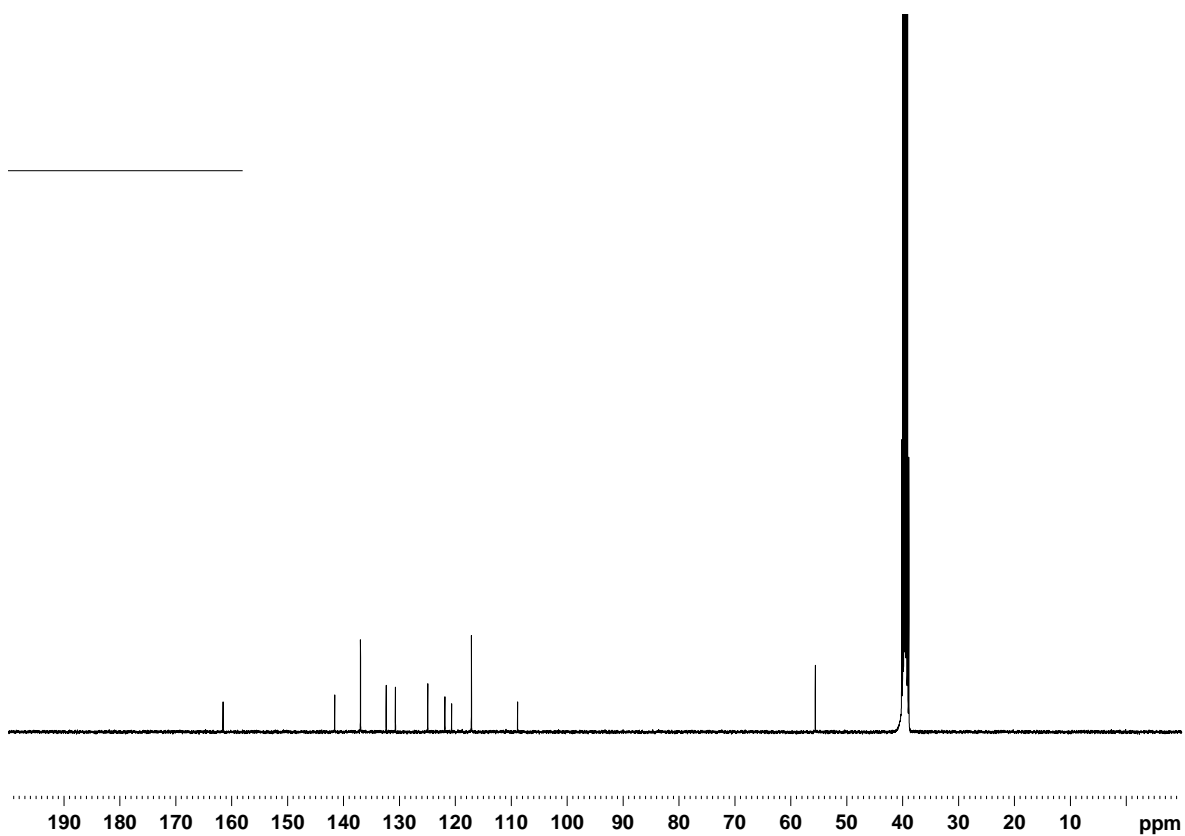

Compound 11

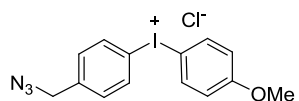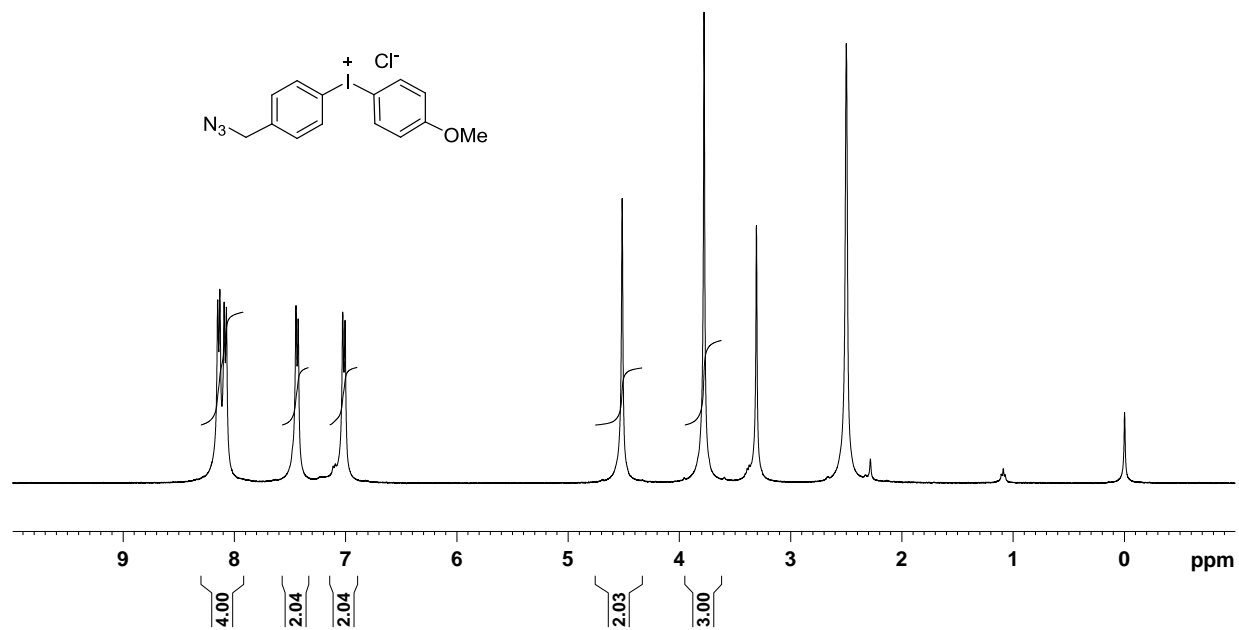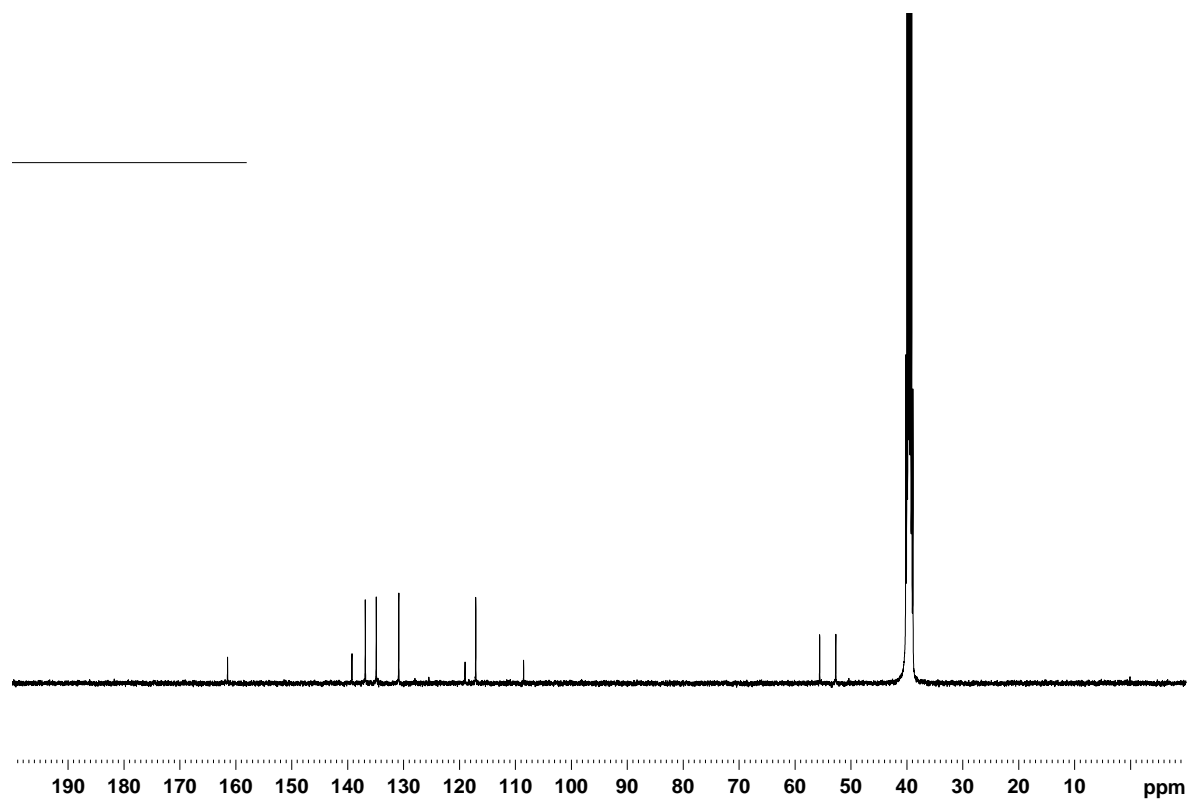

# Compound 12

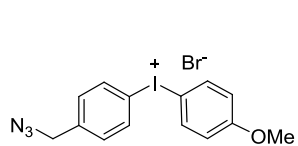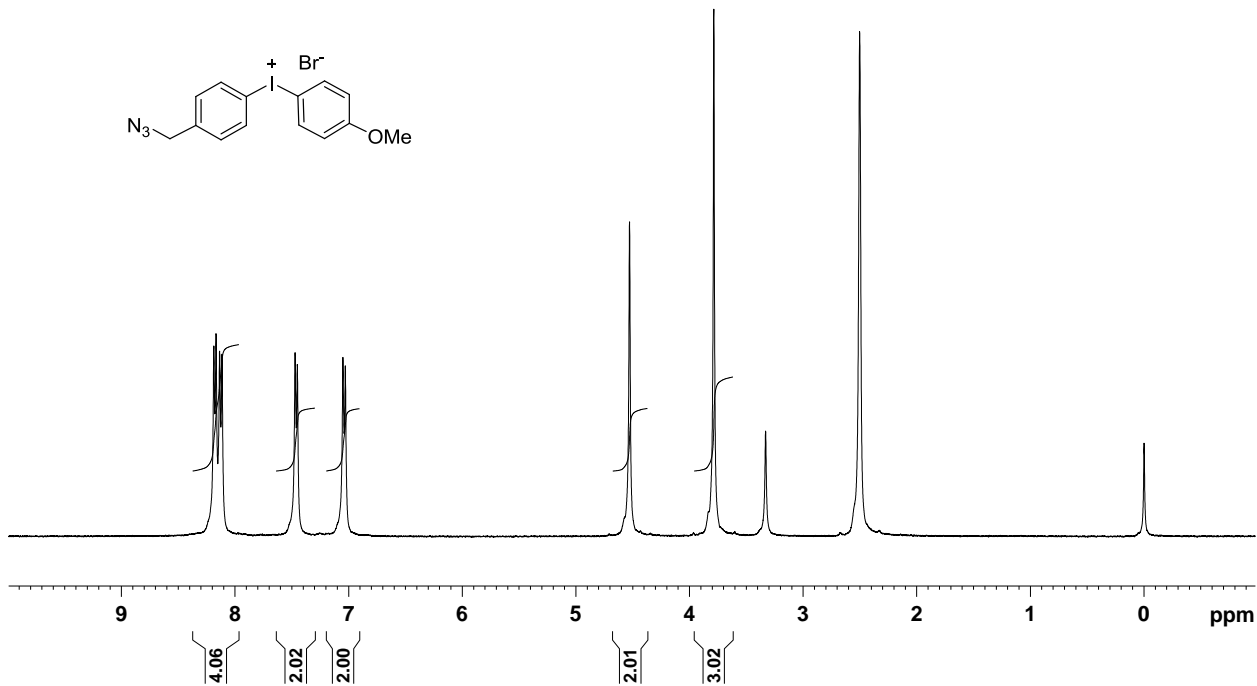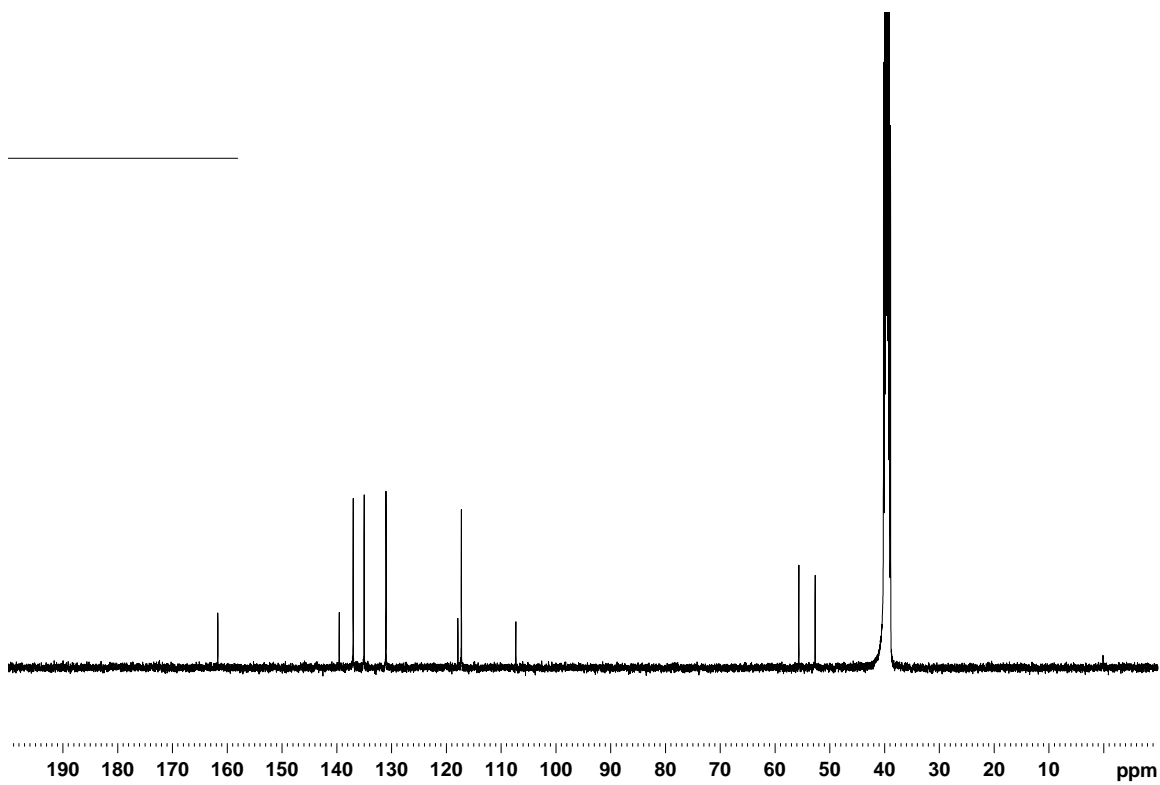

# Compound 13

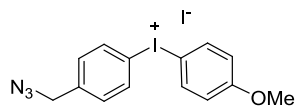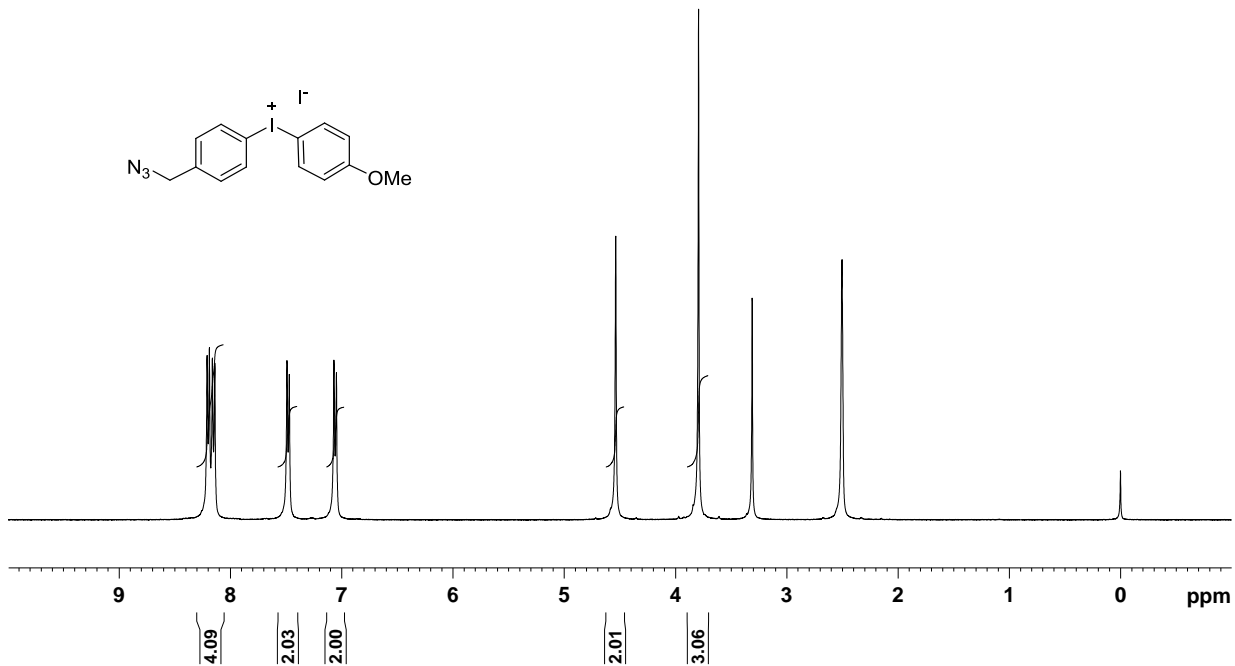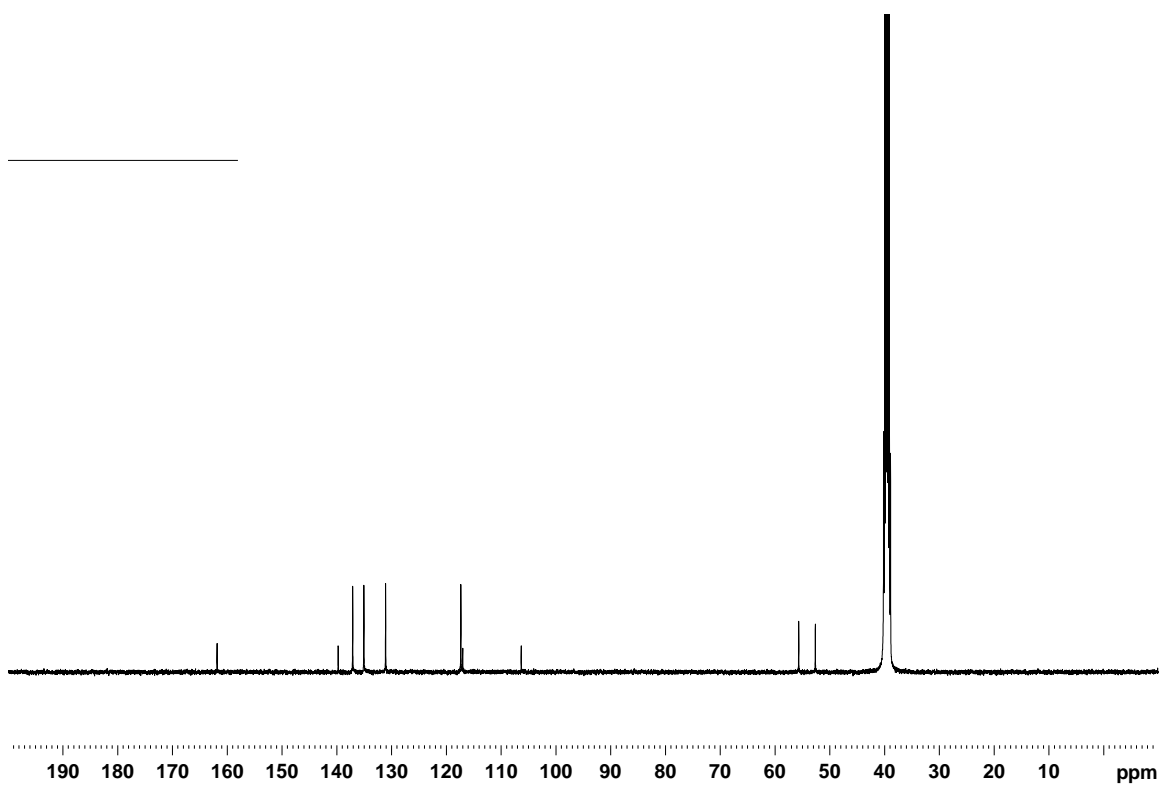



# Compound 14

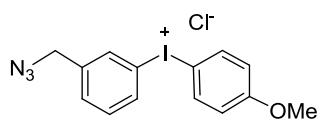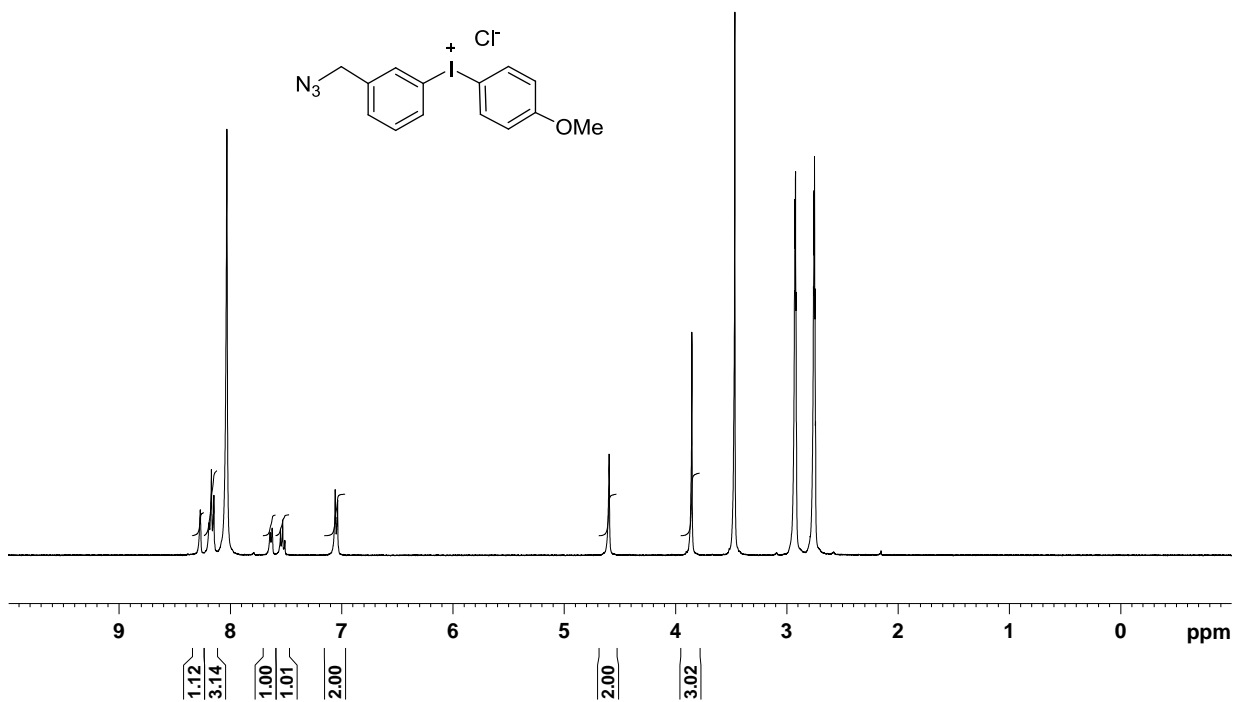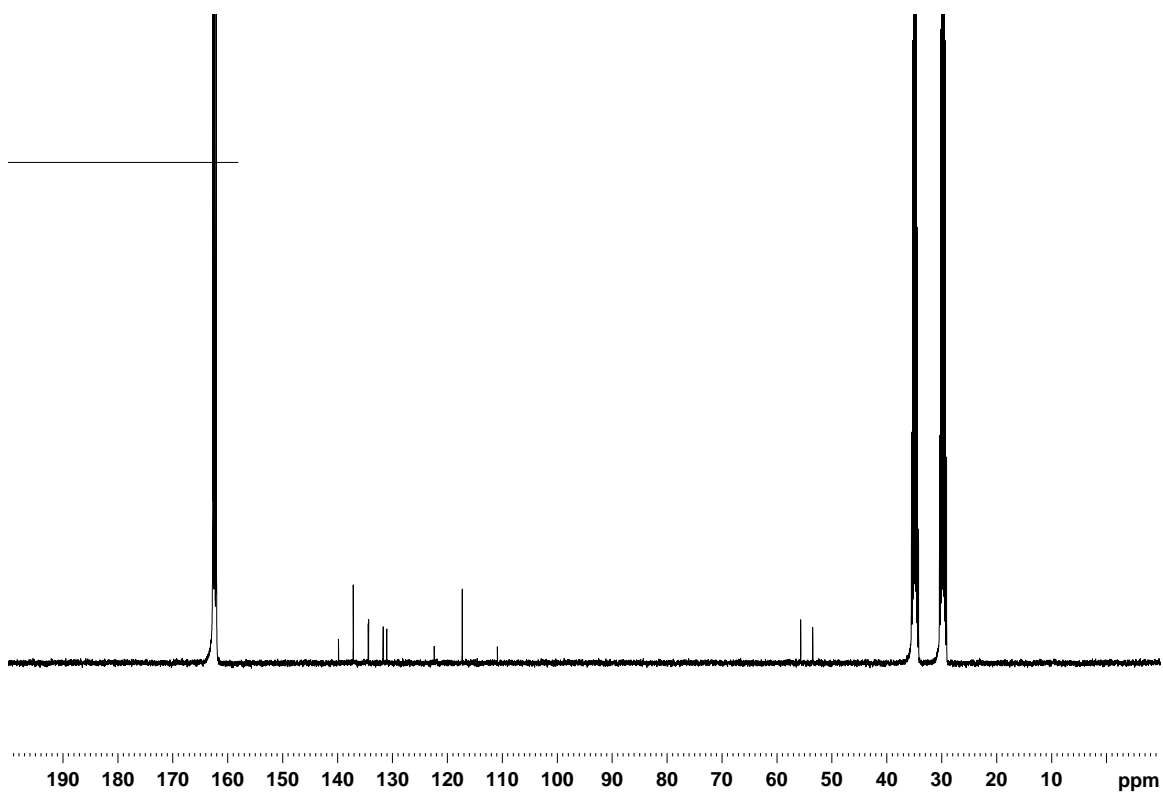

Appendix 2. Selected radio-HPLC chromatograms from analyses of reaction products from the radiofluorination of diaryliodonium salts.

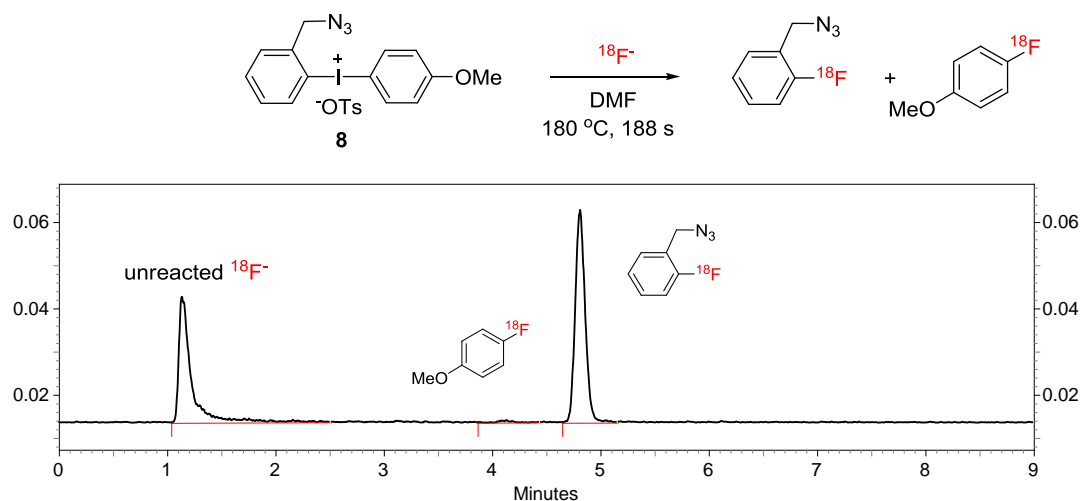

Figure S1. Radiochromatogram from the HPLC analysis of the products from the reaction of  $^{18}\text{F}$ fluoride ion with compound **8** at 180 °C for 188 s in DMF.

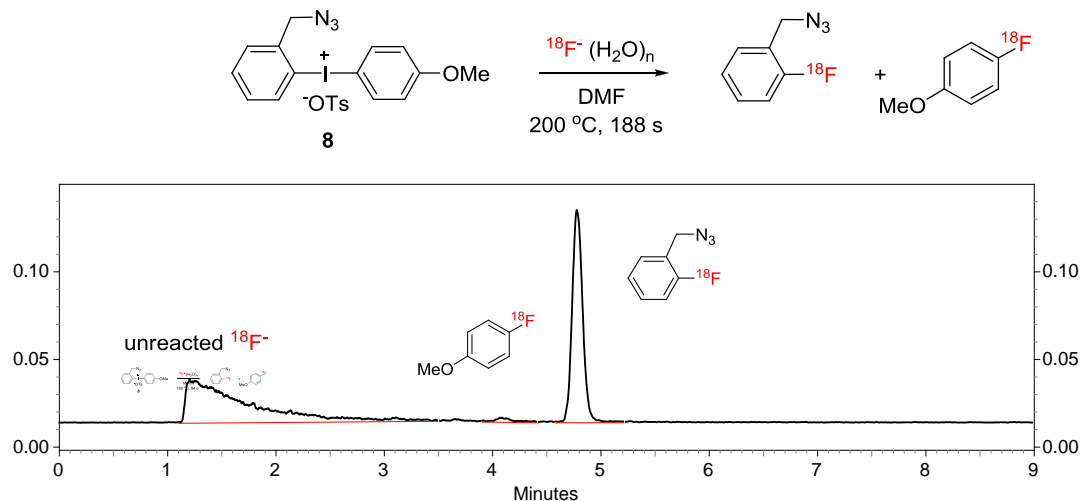

Figure S2. Radiochromatogram from the HPLC analysis of the products from the reaction of  $^{18}\text{F}$ fluoride ion with compound **8** at 200 °C for 188 s in DMF.

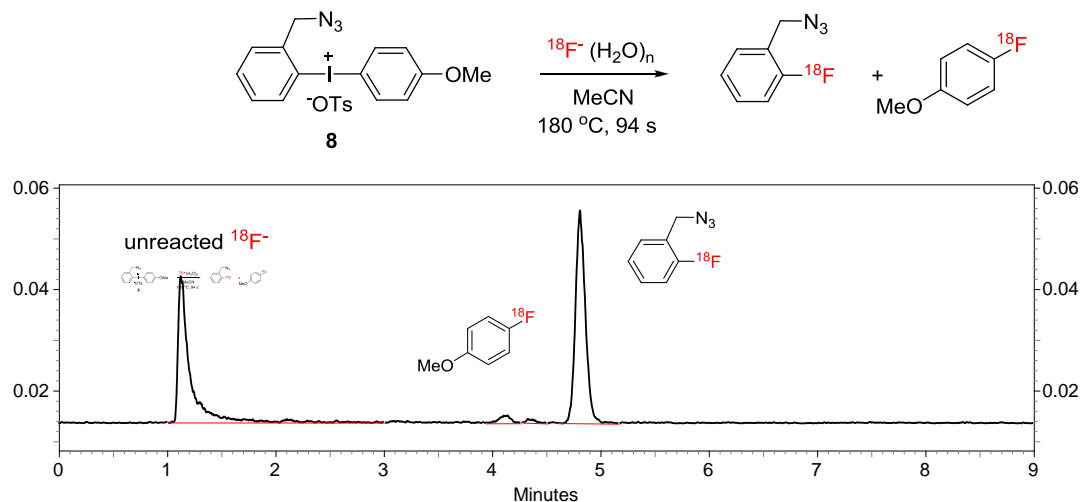

Figure S3. Radiochromatogram from the HPLC analysis of the products from the reaction of  $^{18}\text{F}$ fluoride ion with compound **8** at 180 °C for 94 s in MeCN.
